# Supplementary material for: Comparative pharmacological studies on novel green-synthesized nano-zero-valent aluminum
Source: Royal Society of Chemistry journal article supplement (doi:10.1039/d5ra03179f), 2025-01-01
Supplement: d5ra03179f1.pdf [file d5ra03179f1.pdf]

## **Comparative Pharmacological Studies of Novel Green Synthesized Nano zero-valent Aluminum**

**Fady Sayed Youssef<sup>1</sup>; Magdi E.A. Zaki<sup>2\*</sup>, Nadeen Nasser<sup>3\*</sup>; Sami A. Al-Hussain<sup>2</sup>,  
Gehad G. Mohamed<sup>3,4</sup>; Omar A. Fouad<sup>3</sup>**

<sup>1</sup> Pharmacology Department, Faculty of Veterinary Medicine, Cairo University, 12211 Giza, Egypt

<sup>2</sup> Department of Chemistry, Faculty of Science, Imam Mohammad Ibn Saud Islamic University (IMSIU), Riyadh 11623, Saudi Arabia

<sup>3</sup> Chemistry Department, Faculty of Science, Cairo University, 12613, Giza, Egypt

<sup>4</sup> Nanoscience Department, Basic and Applied Sciences Institute, Egypt-Japan University of Science and Technology, New Borg El Arab, Alexandria, 21934, Egypt

**The corresponding authors: Nadeen Naseer** (Email: [nadeen@sci.cu.edu.eg](mailto:nadeen@sci.cu.edu.eg)); M.E.A. Zaki ([mezaki@imamu.edu.eg](mailto:mezaki@imamu.edu.eg))

### **Supporting Information**

#### **SI.1. Morphological Effects of GT-NZVAI (40) in wi38 cells at different concentrations.**

Cell viability at various doses was monitored and correlated with large-scale morphological changes at the cell surface or in the cytoskeleton compared to control at different concentrations of 1000,500,250,125,62.5 and 31.25 ug/ml.

#### **SI.2. Effect of GT-NZVAI (100) on wi38 cells at different concentrations.**

Cell viability at various doses was monitored and correlated with large-scale morphological changes at the cell surface or in the cytoskeleton compared to control at different concentrations of 1000,500,250,125,62.5 and 31.25 ug/ml.

#### **SI.3. Effect of doxorubicin on wi38 cells at different concentrations.**

Cell viability at various doses was monitored and correlated with large-scale morphological changes at the cell surface or in the cytoskeleton compared to control at different concentrations of 1000,500,250,125,62.5 and 31.25 ug/ml.

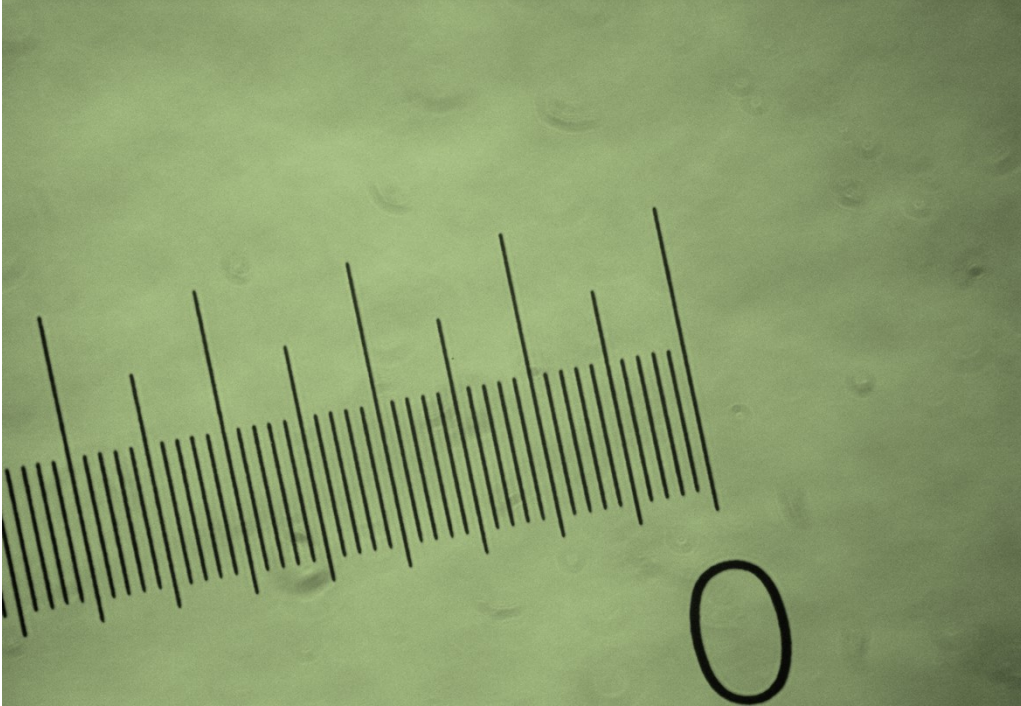

Scale bar of 20× equals 100μm

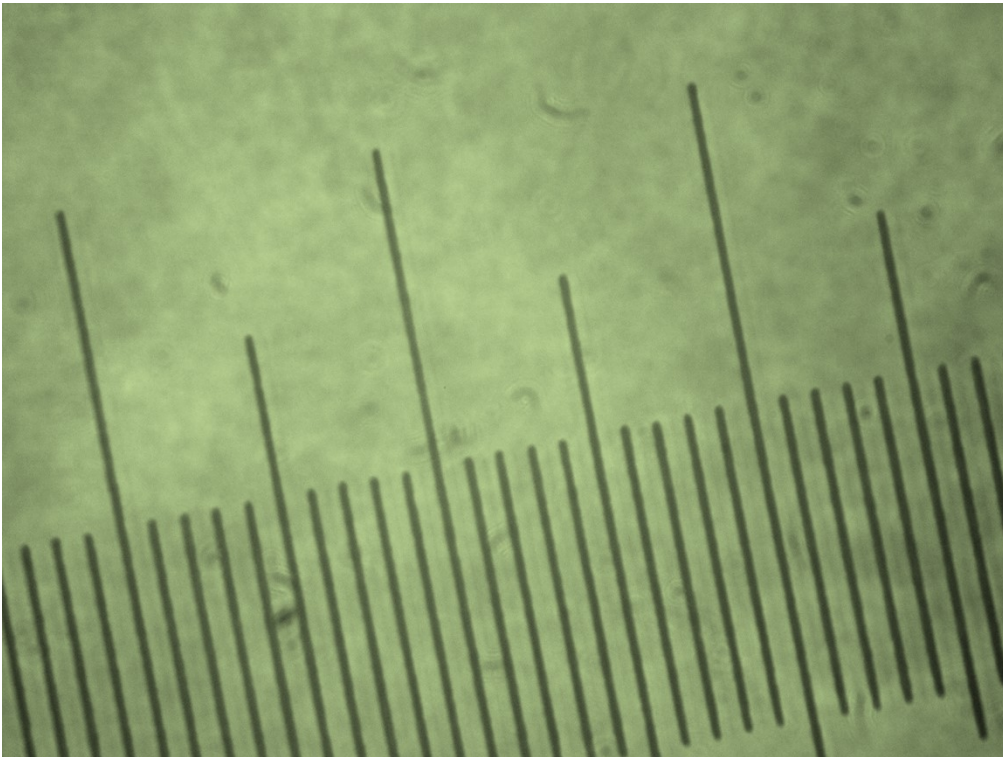

Scale bar of 40× equals 100μm
